# Supplementary material for: Role of tesmin expression in non-small cell lung cancer
Source: PubMed Central journal article supplement — Oncol Lett. 2020 Nov 17;21(1):48. doi: 10.3892/ol.2020.12309 (PMC7709552; doi:10.3892/ol.2020.12309), 2020-11-17

Figure S1. Analysis of immunohistochemical expression of tesmin in groups of smokers and non-smokers revealed a non-significant trend of (A) higher cytoplasmic and (B) higher nuclear tesmin expression in smoking patients (Mann-Whitney test). IRS, immunoreactive score.

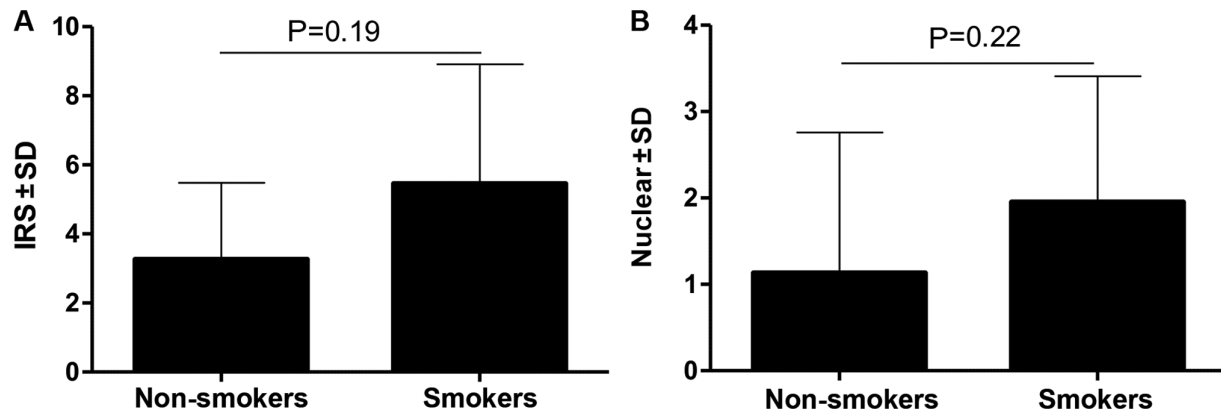

Supplement: Supplementary_Data.pdf [file Supplementary_Data.pdf]
